# Supplementary figures and images for: Multi-color luminescence of hybrids based with lanthanide functionalized zeolite A and titania
Source: Springer Nature journal article supplement (doi:10.1007/s00396-015-3613-9), 2015-05-04

**Supporting information**


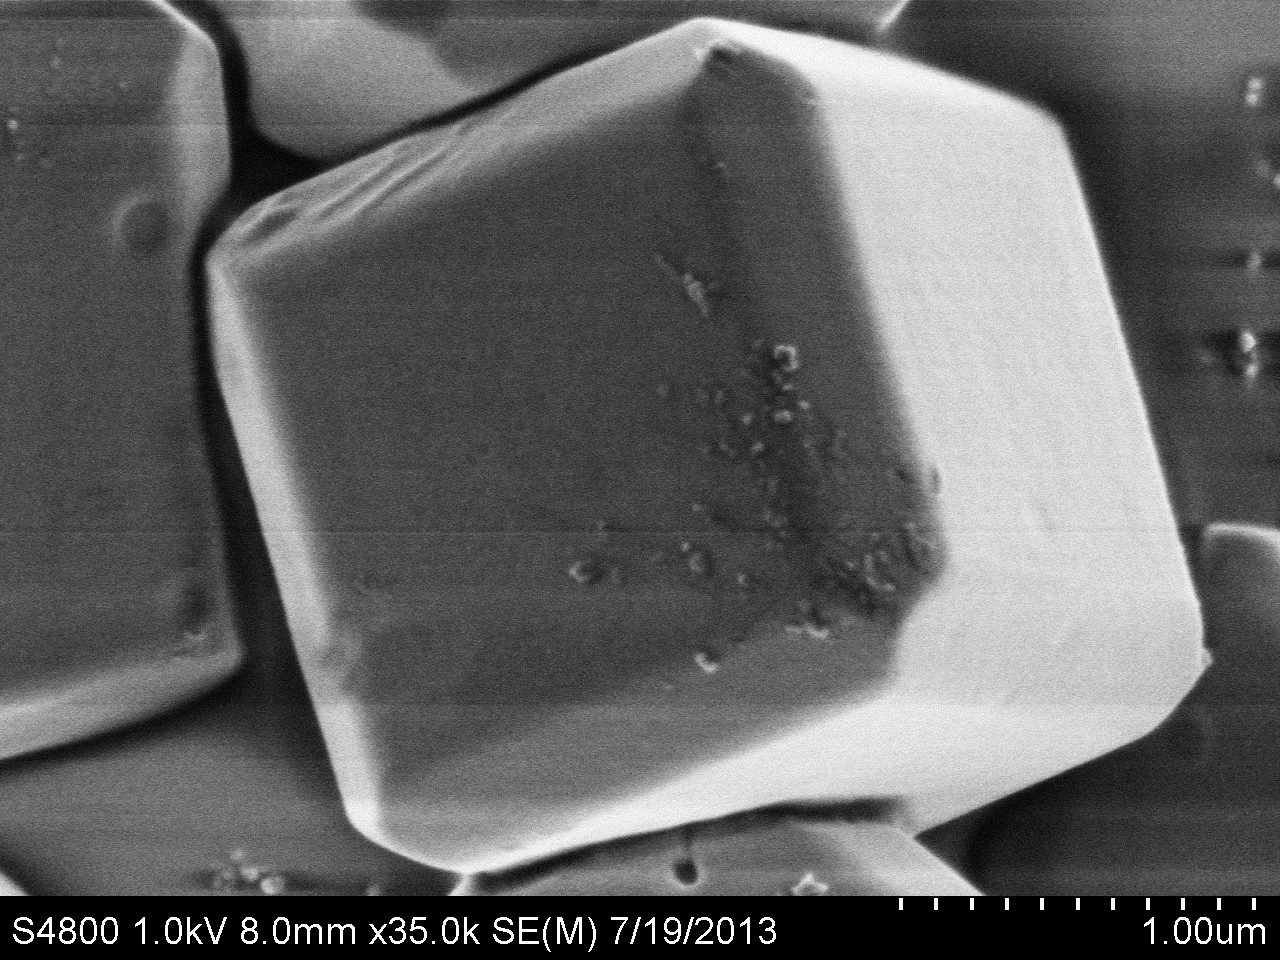


**Figure S1** The SEM image (top) and XRD pattern (bottom) of prepared ZA.

Supplement: MOESM1 [file 10947702]
